# Supplementary material for: TLR4 Signaling and Heme Oxygenase-1/Carbon Monoxide Pathway Crosstalk Induces Resiliency of Myeloma Plasma Cells to Bortezomib Treatment
Source: MDPI journal article supplement (doi:10.3390/antiox11040767), 2022-04-12
Supplement: s1 [file s1]

## Article

# TLR4 Signaling and Heme Oxygenase-1/Carbon Monoxide Pathway Crosstalk Induces Resiliency of Myeloma Plasma Cells to Bortezomib Treatment

Grazia Scandura <sup>1†</sup>, Cesarina Giallongo <sup>2†</sup>, Fabrizio Puglisi <sup>1</sup>, Alessandra Romano <sup>1</sup>, Nunziatina Laura Parrinello <sup>1</sup>, Tatiana Zuppelli <sup>3</sup>, Lucia Longhitano <sup>3</sup>, Sebastiano Giallongo <sup>3</sup>, Michelino Di Rosa <sup>3</sup>, Giuseppe Musumeci <sup>3</sup>, Roberto Motterlini <sup>4</sup>, Roberta Foresti <sup>4</sup>, Giuseppe Alberto Palumbo <sup>2,\*</sup>, Giovanni Li Volti <sup>3,\*</sup>, Francesco Di Raimondo <sup>1‡</sup> and Daniele Tibullo <sup>3‡</sup>

**Citation:** Scandura, G.; Giallongo, C.; Puglisi, F.; Romano, A.; Parrinello, N.L.; Zuppelli, T.; Longhitano, L.; Giallongo, S.; Di Rosa, M.; Musumeci, G.; et al. TLR4 Signaling and Heme Oxygenase-1/Carbon Monoxide Pathway Crosstalk Induces Resiliency of Myeloma Plasma Cells to Bortezomib Treatment. *Antioxidants* **2022**, *11*, 767. <https://doi.org/10.3390/antiox11040767>

Academic Editor: Stanley Omaye

Received: 9 March 2022

Accepted: 8 April 2022

Published: 12 April 2022

**Publisher's Note:** MDPI stays neutral with regard to jurisdictional claims in published maps and institutional affiliations.

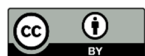

**Copyright:** © 2022 by the authors. Licensee MDPI, Basel, Switzerland. This article is an open access article distributed under the terms and conditions of the Creative Commons Attribution (CC BY) license (<https://creativecommons.org/licenses/by/4.0/>).

- <sup>1</sup> Division of Hematology, Department of General Surgery and Medical-Surgical Specialties, A.O.U. "Policlinico-Vittorio Emanuele", University of Catania, 95123 Catania, Italy; gra.scandura@gmail.com (G.S.); puglisi.fabri@gmail.com (F.P.); sandrina.romano@gmail.com (A.R.); lauraparrinello@tiscali.it (N.L.P.); diraimon@unict.it (F.D.R.)
  - <sup>2</sup> Department of Scienze Mediche Chirurgiche e Tecnologie Avanzate "G.F. Ingrassia", University of Catania, 95123 Catania, Italy; cesarina.giallongo@unict.it
  - <sup>3</sup> Department of Biomedical and Biotechnological Sciences, University of Catania, 95123 Catania, Italy; tatiana.zuppelli@gmail.com (T.Z.); lucialonghitano@hotmail.it (L.L.); sebastiano.giallongo@gmail.com (S.G.); mdirosa@unict.it (M.D.R.); g.musumeci@unict.it (G.M.); d.tibullo@unict.it (D.T.)
  - <sup>4</sup> Faculty of Health, University Paris-Est Creteil, INSERM, IMRB, 94010 Creteil, France; roberto.motterlini@inserm.fr (R.M.); roberta.foresti@inserm.fr (R.F.)
- \* Correspondence: palumbo.gam@gmail.com (G.A.P.); livolti@unict.it (G.L.V.)  
 † These authors equally contributed to this work.  
 ‡ These authors equally contributed to this work.

## Supplemental Material.

### 1. Supplemental Method

#### *shHO-1 MM cells generation and XTT proliferation assay*

U266 cells were silenced for HO-1 as previously described [1]. To assay their proliferation cells were plated in a 96-well plate and treated with 2 ug/mL LPS for 24 and 48 hours. XTT assay was then performed as already reported[2].

### Supplemental Figures

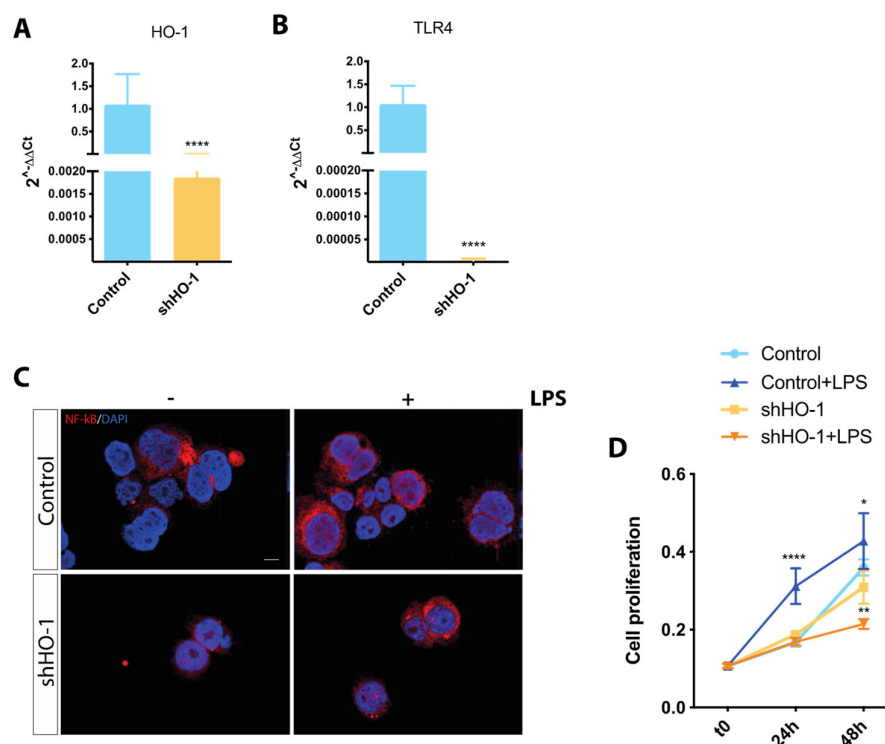

**Figure S1.** HO-1 knockdown impairs TLR4 expression and its signalling. (A–B) HO-1 and TLR4 expression analysis by qPCR analysis. shRNA against HO-1 efficiently mediates its knockdown. In parallel also TLR4 expression turns to be downregulated (C) NF- $\kappa$ B nuclear translocation analysis by immunofluorescence. Upon HO-1 silencing, NF- $\kappa$ B nuclear translocation turns to be impaired. (D) XTT assay on shHO-1 cells. Cells transfected with shRNA against HO-1 did not respond to LPS-induced proliferation as control cells.

### Supplemental References

1. Tibullo, D.; Barbagallo, I.; Giallongo, C.; La Cava, P.; Parrinello, N.; Vanella, L.; Stagno, F.; Palumbo, G.A.; Li Volti, G.; Di Raimondo, F. Nuclear translocation of heme oxygenase-1 confers resistance to imatinib in chronic myeloid leukemia cells. *Curr Pharm Des* **2013**, *19*, 2765–2770, doi:10.2174/1381612811319150012.
2. Maugeri, G.; D'Amico, A.G.; Giunta, S.; Giallongo, C.; Tibullo, D.; Bucolo, C.; Saccone, S.; Federico, C.; Scollo, D.; Longo, A.; et al. Activity-Dependent Neuroprotective Protein (ADNP)-Derived Peptide (NAP) Counteracts UV-B Radiation-Induced ROS Formation in Corneal Epithelium. *Antioxidants (Basel)* **2022**, *11*, doi:10.3390/antiox11010128.
